# Supplementary material for: Population Pharmacokinetics and Pharmacodynamics of Lampalizumab Administered Intravitreally to Patients With Geographic Atrophy
Source: PubMed Central journal article supplement — CPT Pharmacometrics Syst Pharmacol. 2015 Oct 8;4(10):595–604. doi: 10.1002/psp4.12031 (PMC4625864; doi:10.1002/psp4.12031), 2015-10-08

# Supplemental Figure S3

Covariate Effects on  $k$   
Reference: 80-year-old-male

A.

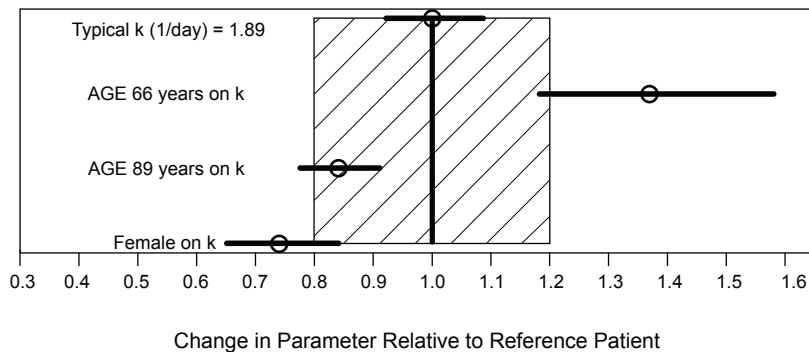

Covariate Effects  $k_{out}$   
Reference: 80-year-old-male

B.

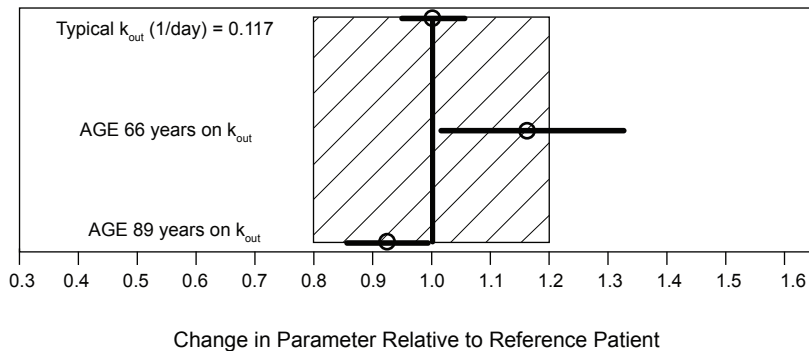

Supplement: psp40004-0595-sd8.pdf [file psp40004-0595-sd8.pdf]
