# Supplementary figures and images for: Population Pharmacokinetics and Pharmacodynamics of Lampalizumab Administered Intravitreally to Patients With Geographic Atrophy
Source: PubMed Central journal article supplement — CPT Pharmacometrics Syst Pharmacol. 2015 Oct 8;4(10):595–604. doi: 10.1002/psp4.12031 (PMC4625864; doi:10.1002/psp4.12031), 2015-10-08

Supplemental Figure S1

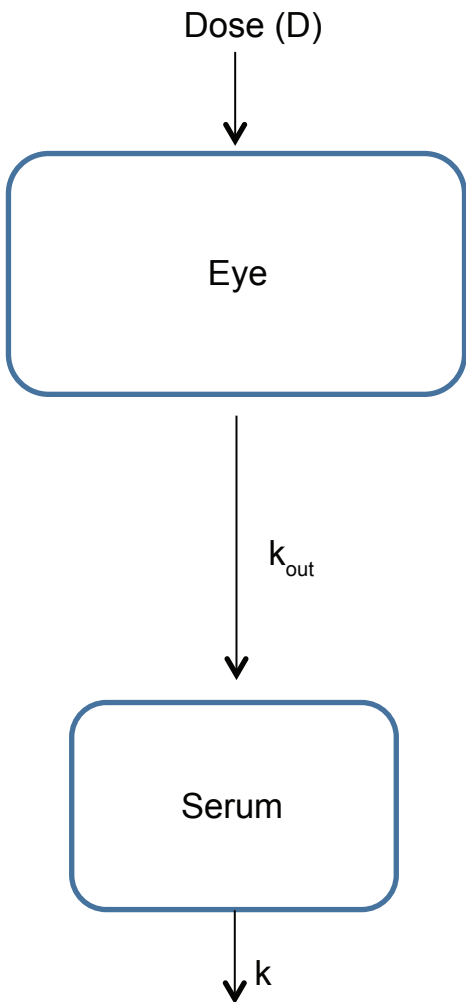

Supplement: psp40004-0595-sd6.pdf [file psp40004-0595-sd6.pdf]

# Supplemental Figure S2

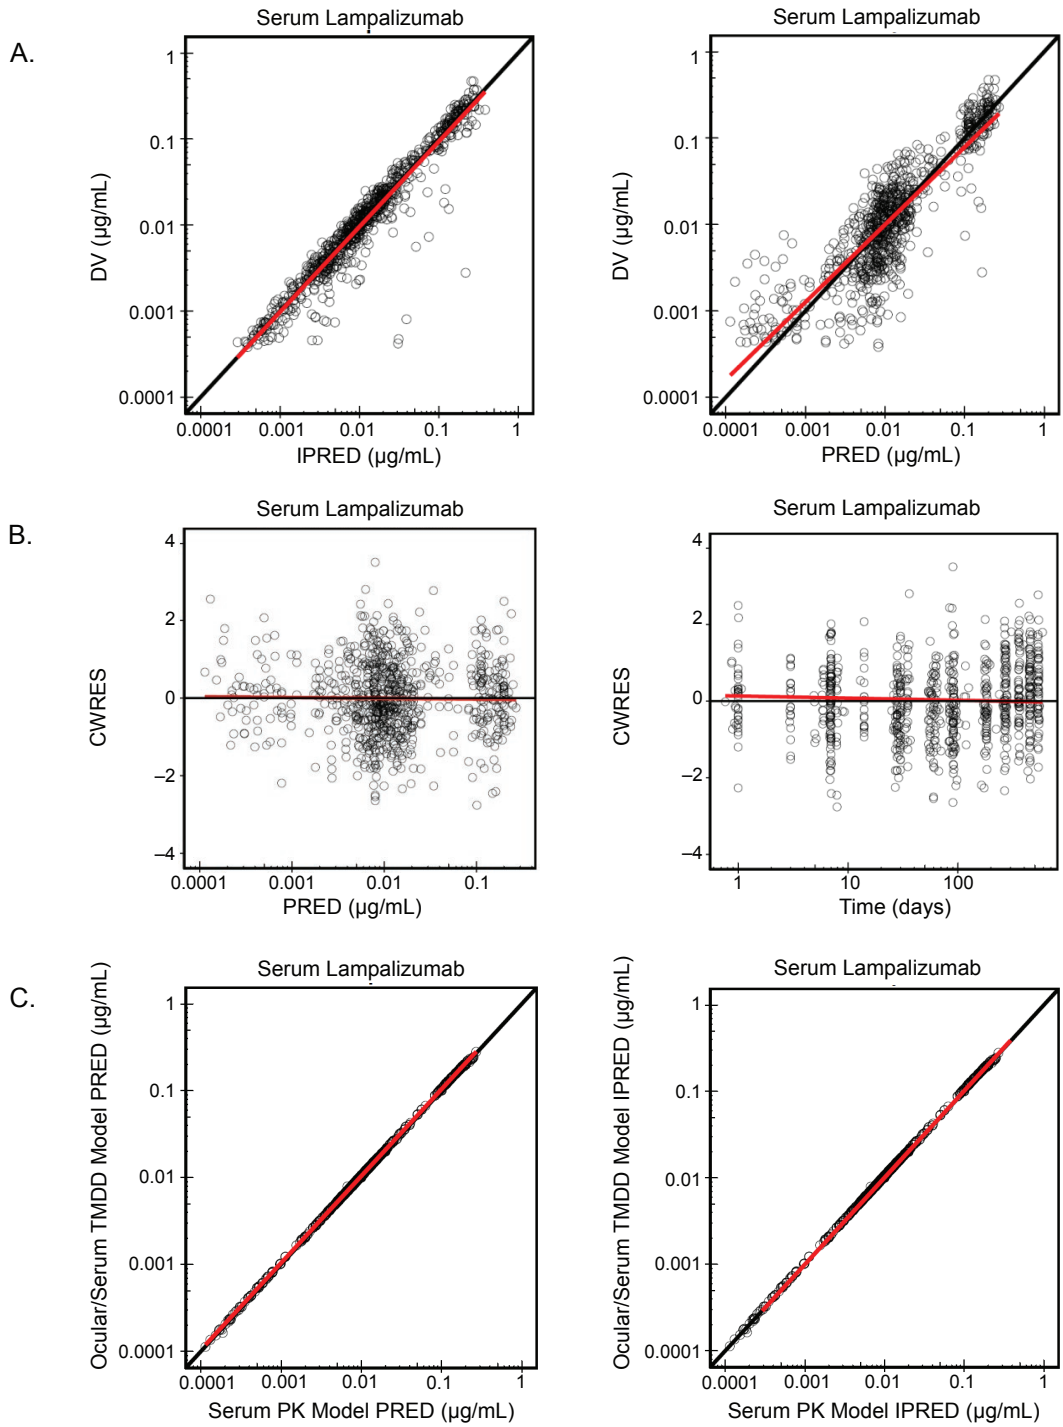

Supplement: psp40004-0595-sd7.pdf [file psp40004-0595-sd7.pdf]
